# Supplementary material for: Effect of Maternal Egg Intake During the Early Neonatal Period and Risk of Infant Egg Allergy at 12 Months Among Breastfeeding Mothers: A Randomized Clinical Trial
Source: PubMed Central journal article supplement (PMC10334231; doi:10.1001/jamanetworkopen.2023.22318), 2023-07-10
Supplement: jamanetwopen-e2322318-s002.pdf [file jamanetwopen-e2322318-s002.pdf]

## Supplementary Online Content

Nagakura KI, Sato S, Shinahara W, et al. Effect of maternal egg intake during the early neonatal period and risk of infant egg allergy at 12 months among breastfeeding mothers: a randomized clinical trial. *JAMA Netw Open*. 2023;6(7):e2322318. doi:10.1001/jamanetworkopen.2023.22318

**eFigure 1.** Intervention Procedures

**eFigure 2.** Specific IgE Levels at 4 and 12 Months of Age

**eFigure 3.** Prevalence of Immediate-Type Egg Allergy Based on the OVM Detection in Breast Milk on Days 3-4 and Eczema at 1 Month in Both Groups

**eTable 1.** Adherence to Intervention During Admission

**eTable 2.** Nutrition Methods at 1 and 4 Months of Age

**eTable 3.** Nutrition Methods in Children at 7 and 10 Months of Age

**eTable 4.** Proportions of Infants With OVA and OVM Detection in Breast Milk

**eTable 5.** Logistic Regression Analysis of Factors Contributing to Developing IgE-Mediated Egg Allergy

**eMethods.** Determination of OVA and OVM Antigen Levels in Breast Milk Using a DCP Chip Equipped With Antigen-Specific Antibodies

**eReferences**

This supplementary material has been provided by the authors to give readers additional information about their work.

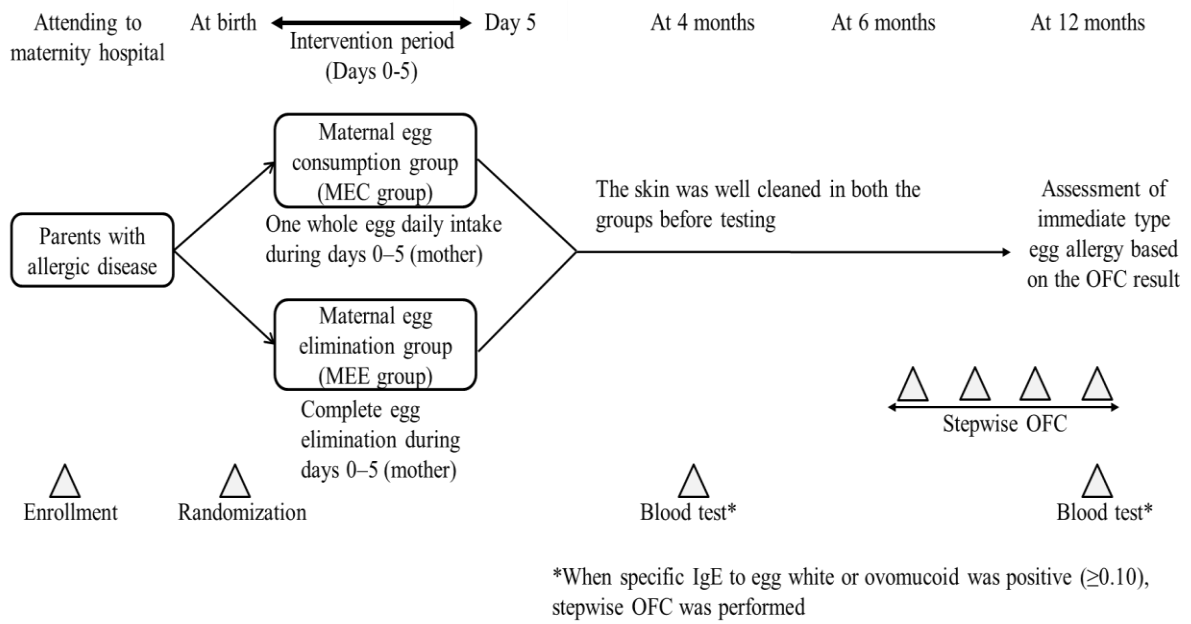

**eFigure 1. Intervention procedures. OFC: oral food challenge.**

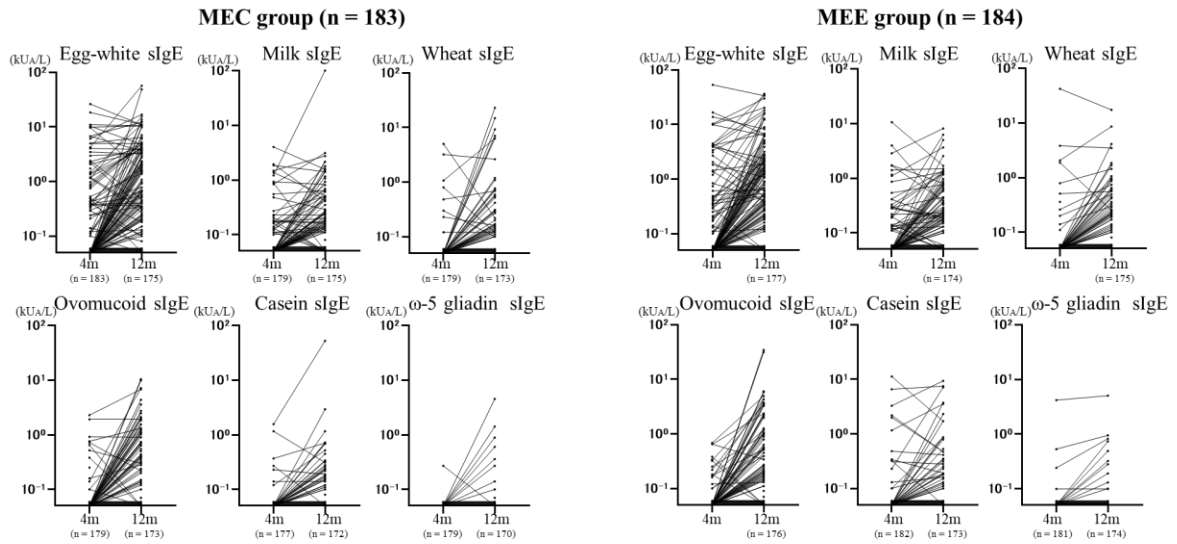

**Figure 2.** Specific IgE levels at 4 and 12 months of age.

At 4 months of age, sensitizations to egg white, OVM, milk, casein, wheat, and  $\omega$ -5 gliadin were respectively observed in 30.1%, 7.1%, 16.4%, 3.8%, 4.4%, and 0.5% of participants in the MEC group and 26.6%, 8.7%, 18.5%, 8.2%, 6.0%, and 1.6% of participants in the MEE group. At 12 months of age, sensitizations to egg white, OVM, milk, casein, wheat, and  $\omega$ -5 gliadin were respectively observed in 62.8%, 31.1%, 37.2%, 18.6%, 25.7%, and 4.4% of participants in the MEC group and 58.7%, 33.2%, 39.7%, 20.1%, 25.0%, and 5.4% of participants in the MEE group.

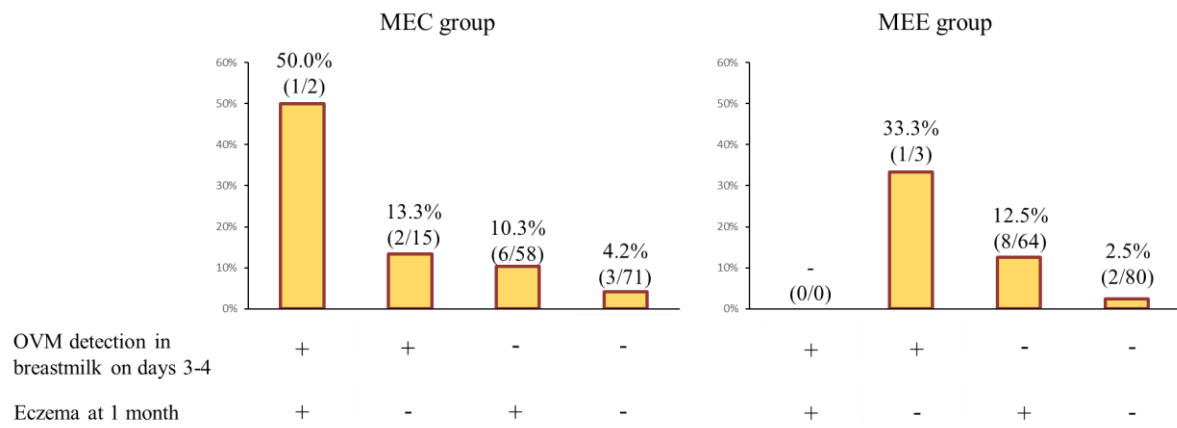

**eFigure 3.** Prevalence of immediate-type egg allergy based on the OVM detection in breast milk on days 3-4 and eczema at 1 month in both groups.

**eTable 1.** Adherence to intervention during admission.

|         |                                                                           | MEC group<br>(n = 190) | MEE group<br>(n = 190) |
|---------|---------------------------------------------------------------------------|------------------------|------------------------|
|         | Mothers who ingested a whole hen's egg                                    | 187 (98.4%)            | -                      |
| Mothers |                                                                           |                        |                        |
|         | Mothers who completely eliminated hen's eggs                              | -                      | 184 (96.8%)            |
| Infants | Amount of consumption of breastmilk per feeding on day 3,<br>median (IQR) | 12 ml (4-<br>28ml)     | 12 ml (4-<br>31ml)     |

To determine the amount of consumption of breastmilk per feeding on day 3, we measured the weight of the infants before and after each feeding.

**eTable 2.** Nutrition methods at 1 and 4 months of age.

|         |                           | 1 month of age                                                                                                                                                                   |                                                                                                                                                                                 |         | 4 months of age                                                                                                                                                                   |                                                                                                                                                                                  |         |
|---------|---------------------------|----------------------------------------------------------------------------------------------------------------------------------------------------------------------------------|---------------------------------------------------------------------------------------------------------------------------------------------------------------------------------|---------|-----------------------------------------------------------------------------------------------------------------------------------------------------------------------------------|----------------------------------------------------------------------------------------------------------------------------------------------------------------------------------|---------|
|         |                           | MEC group (n = 183)                                                                                                                                                              | MEE group (n = 184)                                                                                                                                                             | P value | MEC group (n = 183)                                                                                                                                                               | MEE group (n = 184)                                                                                                                                                              | P value |
| Infants | Feeding                   | Exclusive breast milk: 57 (31.1%)<br>Mixed: 117 (63.9%)<br>Formula feeding: 2 (1.1%)<br>Unknown: 6 (3.3%)                                                                        | Exclusive breast milk: 57 (31.0%)<br>Mixed: 119 (64.7%)<br>Formula feeding: 0 (0.0%)<br>Unknown: 8 (4.3%)                                                                       | >.99    | Exclusive breast milk: 88 (48.1%)<br>Mixed: 74 (40.4%)<br>Formula feeding: 11 (6.0%)<br>Unknown: 10 (5.5%)                                                                        | Exclusive breast milk: 85 (46.2%)<br>Mixed: 81 (44.0%)<br>Formula feeding: 11 (6.0%)<br>Unknown: 7 (3.8%)                                                                        | >.99    |
| Mothers | Number of egg consumption | ≥2 times/day: 22 (12.0%)<br>1 time/day: 47 (25.7%)<br>4-6 times/week: 65 (35.5%)<br>2-3 times/week: 39 (21.3%)<br>1 time/week: 4 (2.2%)<br>0 time: 0 (0.0%)<br>Unknown: 6 (3.3%) | ≥2 times/day: 16 (8.7%)<br>1 time/day: 70 (38.0%)<br>4-6 times/week: 42 (22.8%)<br>2-3 times/week: 41 (22.3%)<br>1 time/week: 7 (3.8%)<br>0 time: 1 (0.5%)<br>Unknown: 7 (3.8%) | >.99    | ≥ 2 times/day: 18 (9.8%)<br>1 time/day: 58 (31.7%)<br>4-6 times/week: 47 (25.7%)<br>2-3 times/week: 46 (25.1%)<br>1 time/week: 4 (2.2%)<br>0 time: 0 (0.0%)<br>Unknown: 10 (5.5%) | ≥ 2 times/day: 18 (9.8%)<br>1 time/day: 54 (29.3%)<br>4-6 times/week: 54 (29.3%)<br>2-3 times/week: 44 (23.9%)<br>1 time/week: 6 (3.3%)<br>0 time: 1 (0.5%)<br>Unknown: 7 (3.8%) | >.99    |
|         | Amount of egg consumption | ≥3: 1 (0.5%)<br>2: 14 (7.7%)<br>1: 131 (71.6%)<br>1/2: 26 (14.2%)<br>1/4: 5 (2.7%)<br>Unknown: 6 (3.3%)                                                                          | ≥3: 0 (0.0%)<br>2: 6 (3.3%)<br>1: 133 (72.3%)<br>1/2: 27 (14.7%)<br><1/4: 11 (6.0%)<br>Unknown: 7 (3.8%)                                                                        | >.99    | ≥3: 1 (0.5%)<br>2: 18 (9.8%)<br>1: 123 (67.2%)<br>1/2: 27 (14.8%)<br>≤1/4: 4 (2.2%)<br>Unknown: 10 (5.5%)                                                                         | ≥3: 0 (0.0%)<br>2: 21 (11.4%)<br>1: 112 (60.9%)<br>1/2: 29 (15.8%)<br><1/4: 15 (8.2%)<br>Unknown: 7 (3.8%)                                                                       | >.99    |

**eTable 3.** Nutrition methods in children at 7 and 10 months of age.

|             |               | 7 months of age                                                             |                                                                             | <i>P</i><br>value | 10 months of age                                                            |                                                                             | <i>P</i><br>value |
|-------------|---------------|-----------------------------------------------------------------------------|-----------------------------------------------------------------------------|-------------------|-----------------------------------------------------------------------------|-----------------------------------------------------------------------------|-------------------|
|             |               | MEC group (n = 175)                                                         | MEE group (n = 180)                                                         |                   | MEC group (n = 175)                                                         | MEE group (n = 173)                                                         |                   |
| Breast milk |               | 151 (86.3%)                                                                 | 156 (86.7%)                                                                 | >.99              | 131 (74.9%)                                                                 | 124 (71.7%)                                                                 | .55               |
| Solid food  | Times per day | 3 times: 3 (1.7%), 2 times: 102 (58.3%), 1 time: 67 (38.3%), None: 3 (1.7%) | 3 times: 6 (3.3%), 2 times: 110 (61.1%), 1 time: 62 (34.4%), None: 2 (1.1%) | >.99              | 3 times: 156 (89.1%), 2 times: 19 (10.9%), 1 time: 0 (0.0%), None: 0 (0.0%) | 3 times: 144 (83.2%), 2 times: 27 (15.6%), 1 time: 1 (0.6%), None: 1 (0.6%) | >.99              |
|             | Egg yolk      | 77 (44.0%)                                                                  | 73 (40.6%)                                                                  | .52               | 128 (73.1%)                                                                 | 129 (74.6%)                                                                 | .81               |
|             | Egg white     | 30 (17.1%)                                                                  | 29 (16.1%)                                                                  | .89               | 127 (72.6%)                                                                 | 136 (78.6%)                                                                 | .21               |
|             | Cow's milk    | 41 (23.4%)                                                                  | 40 (22.2%)                                                                  | .80               | 121 (69.1%)                                                                 | 119 (68.8%)                                                                 | >.99              |
|             | Wheat         | 95 (54.3%)                                                                  | 90 (50.0%)                                                                  | .46               | 169 (96.6%)                                                                 | 162 (93.6%)                                                                 | .22               |
|             | Soy           | 125 (71.4%)                                                                 | 116 (64.4%)                                                                 | .17               | 171 (97.7%)                                                                 | 163 (94.2%)                                                                 | .11               |
|             | Fish          | 136 (77.7%)                                                                 | 128 (71.1%)                                                                 | .18               | 173 (98.9%)                                                                 | 171 (98.8%)                                                                 | >.99              |
|             | Chicken       | 47 (26.9%)                                                                  | 40 (22.2%)                                                                  | .33               | 171 (97.7%)                                                                 | 166 (96.0%)                                                                 | .38               |
|             | Rice          | 171 (97.7%)                                                                 | 174 (96.7%)                                                                 | .75               | 175 (100.0%)                                                                | 172 (99.4%)                                                                 | .50               |
|             | Peanut        | 1 (0.6%)                                                                    | 2 (1.1%)                                                                    | >.99              | 9 (5.1%)                                                                    | 10 (5.8%)                                                                   | .82               |

**eTable 4.** Proportions of infants with OVA and OVM detection in breast milk.

|               | MEC group<br>(n = 150) | MEE group<br>(n = 147) | RR (95%CI)        |
|---------------|------------------------|------------------------|-------------------|
| OVA detection | 16 (10.7%)             | 3 (2.0%)               | 5.23 (1.56-17.56) |
| Days 3-4      |                        |                        |                   |
| OVM detection | 17 (11.3%)             | 3 (2.0%)               | 5.55 (1.66-18.55) |
| OVA detection | 8/148 (5.4%)           | 10/145 (6.9%)          | 0.78 (0.32-1.93)  |
| 1 month       |                        |                        |                   |
| OVM detection | 6/148 (4.1%)           | 6/145 (4.1%)           | 0.98 (0.32-2.97)  |

OVA: ovalbumin; OVM: ovomucoid; MEC: maternal egg consumption; MEE: maternal egg elimination; RR: risk ratio; CI: confidence interval.



**eTable 5.** Logistic regression analysis of factors contributing to developing IgE-mediated egg allergy

|                                         | Adjusted RRs (95%CI) | P value |
|-----------------------------------------|----------------------|---------|
| Randomization to the MEC or MEE group   | 0.94 (0.46-1.92)     | .86     |
| Mother with allergic disease            | 2.23 (0.58-8.61)     | .24     |
| Cesarean delivery                       | 1.63 (0.77-3.44)     | .20     |
| OVM detection in breastmilk on days 3-4 | 4.04 (1.58-10.32)    | .003    |
| Eczema at 1 month                       | 2.85 (1.39-5.85)     | .004    |

Multivariate logistic regression analysis was performed using the factors presented in this table as covariates.

RR: risk ratio, MEC: maternal egg consumption; MEE: maternal egg elimination, OVM: ovomucoid.

## eMethods Determination of OVA and OVM antigen levels in breast milk using a DCP chip equipped with antigen-specific antibodies

### **Method for quantification of OVA and OVM antigens**

In this measurement system, allergenic food antigen-specific antibodies were mounted on a chip substrate and detected by sandwich ELISA. Anti-OVA and anti-OVM polyclonal antibodies were produced using Complete Freund's Adjuvant (DIFCO ADJUVANT COMPLETE FREUND, Becton, Dickinson and Company) in rabbits (Japanese white breed) at the Institute for Advanced Enzyme Research, University of Tokushima (1), and antigen affinity purification was performed to obtain anti-OVA and anti-OVM specific rabbit polyclonal IgG antibodies. Each polyclonal purified antibody was coated on a Densely Carboxylated Protein (DCP) chip by a method as described by Suzuki et al. (2) and reacted with samples containing antigen, and antigen levels were then measured by sandwich ELISA using fluorescence-labeled purified secondary antibodies. The fluorescence intensity was determined with a scanner, and the amount of antigen in the sample was calculated from the fluorescence intensity based on a previously prepared calibration curve. The CV values of spot-to-value and array-to-array differences of the prepared DCP antibody-coated chips were less than 15%.

### **Preparation of calibration curves for the detection of OVA and OVM antigens**

Calibration curves for OVA and OVM antigens used in the antigen quantification chip were prepared as follows. Known concentrations of purified OVA (Albumin from chicken egg white, Sigma-Aldrich) or purified OVM antigens (Trypsin inhibitor from chicken egg white, Type III-O, Sigma-Aldrich) were added to chips coated with purified anti-OVA or anti-OVM rabbit polyclonal IgG antibodies. The measurable range of OVA antigen was 0.20–25 ng/mL, and that of OVM antigen was 0.78–25 ng/mL.

**Calibration curve for OVA antigen**

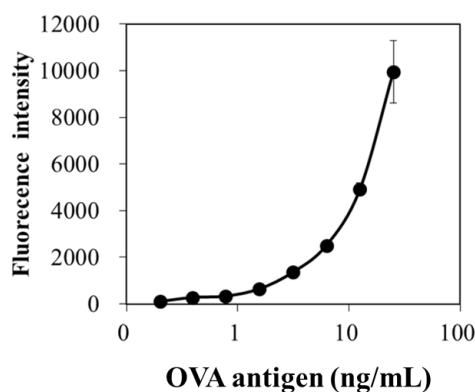

**Calibration curve for OVM antigen**

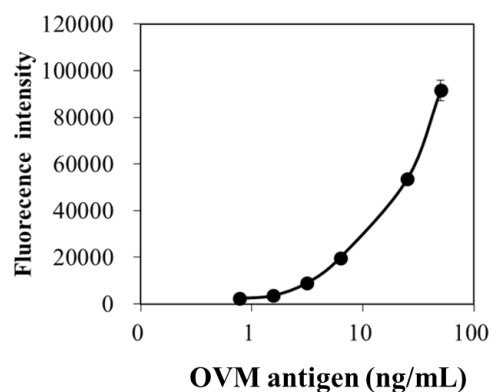

A calibration curve was prepared with the amount of antigen as the horizontal axis and the fluorescence intensity as the vertical axis. The amount of antigen in the sample was calculated from the fluorescence intensity.

To create a calibration curve under measurement conditions similar to breast milk, Morinaga E-milk (for 0–1-year-old babies) (MORINAGA MILK INDUSTRY CO., LTD.), for which the OVA and OVM antigens in the powdered milk solution were previously confirmed to be below the detection limit, was centrifuged (eFig 5) and used as antigen lysate and Blank solution for the calibration curve creation.

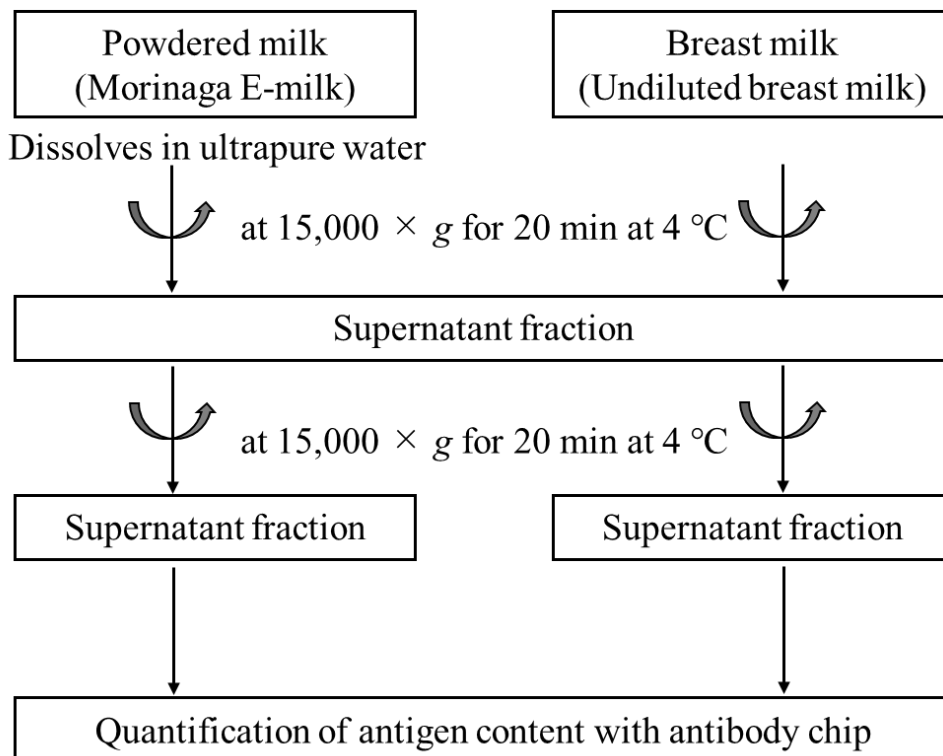

### **Methods for measuring OVA and OVM antigens in breast milk**

The chips coated with anti-OVA or anti-OVM rabbit polyclonal IgG antibodies were reacted with centrifuged breast milk as a sample in the same way as the preparation of powdered milk antigen lysate, and the amount of OVA and OVM antigens contained was measured.

### **eReferences**

1. Kido H, Izumi K, Otsuka H, Fukusen N, Kato Y, Katunuma N. A chymotrypsin-type serine protease in rat basophilic leukemia cells: evidence for its immunologic identity with atypical mast cell protease. *J Immunol.* 1986;136(3):1061-1065.
2. Suzuki K, Hiyoshi M, Tada H, et al. Allergen diagnosis microarray with high-density immobilization capacity using diamond-like carbon-coated chips for profiling allergen-specific IgE and other immunoglobulins. *Anal Chim Acta.* 2011;706(2):321-327.
