# Supplementary material for: Effect of Maternal Egg Intake During the Early Neonatal Period and Risk of Infant Egg Allergy at 12 Months Among Breastfeeding Mothers: A Randomized Clinical Trial
Source: PubMed Central journal article supplement (PMC10334231; doi:10.1001/jamanetworkopen.2023.22318), 2023-07-10
Supplement: jamanetwopen-e2322318-s003.pdf [file jamanetwopen-e2322318-s003.pdf]

## Data Sharing Statement

Nagakura. Effect of Maternal Egg Intake During the Early Neonatal Period and Risk of Infant Egg Allergy at 12 Months Among Breastfeeding Mothers. *JAMA Netw Open*. Published July 10, 2023. doi:10.1001/jamanetworkopen.2023.22318

### Data

**Data available:** Yes

**Data types:** Participant data with identifiers

**How to access data:** [https://center6.umin.ac.jp/cgi-open-bin/ctr\\_e/ctr\\_view.cgi?recptno=R000031625](https://center6.umin.ac.jp/cgi-open-bin/ctr_e/ctr_view.cgi?recptno=R000031625)

**When available:** With publication

### Supporting Documents

**Document types:** None

### Additional Information

**Who can access the data:** Noriyuki Yanagida: [yana@foodallergy.jp](mailto:yana@foodallergy.jp)

**Types of analyses:** Who can access the data: researchers whose proposed use of the data  
Types of analyses: for a specified purpose

**Mechanisms of data availability:** Mechanisms of data availability: after approval of a proposal

**Any additional restrictions:** Any additional restrictions: not particular for now
